# Supplementary material
Source: bioRxiv or medRxiv preprint supplement (https://medrxiv.org/highwire/filestream/80136/field_highwire_adjunct_files/5/2020.05.06.20089573-6.pdf)

**Supplementary Figure 6.** High-risk patients had nasopharyngeal swab positive retests and were readmitted to the hospital. The X-axis represented the duration of time (days) from the initial discharge date to the first positive retest during strict post-discharge quarantine. The Y-axis shows the percentage of high-risk patients who were retested as positive and readmitted to the hospital within the specified duration after discharge following a negative test. Three thresholds for high-risk patients were applied, giving an overall sensitivity of 93%, 81%, and 68%, respectively.

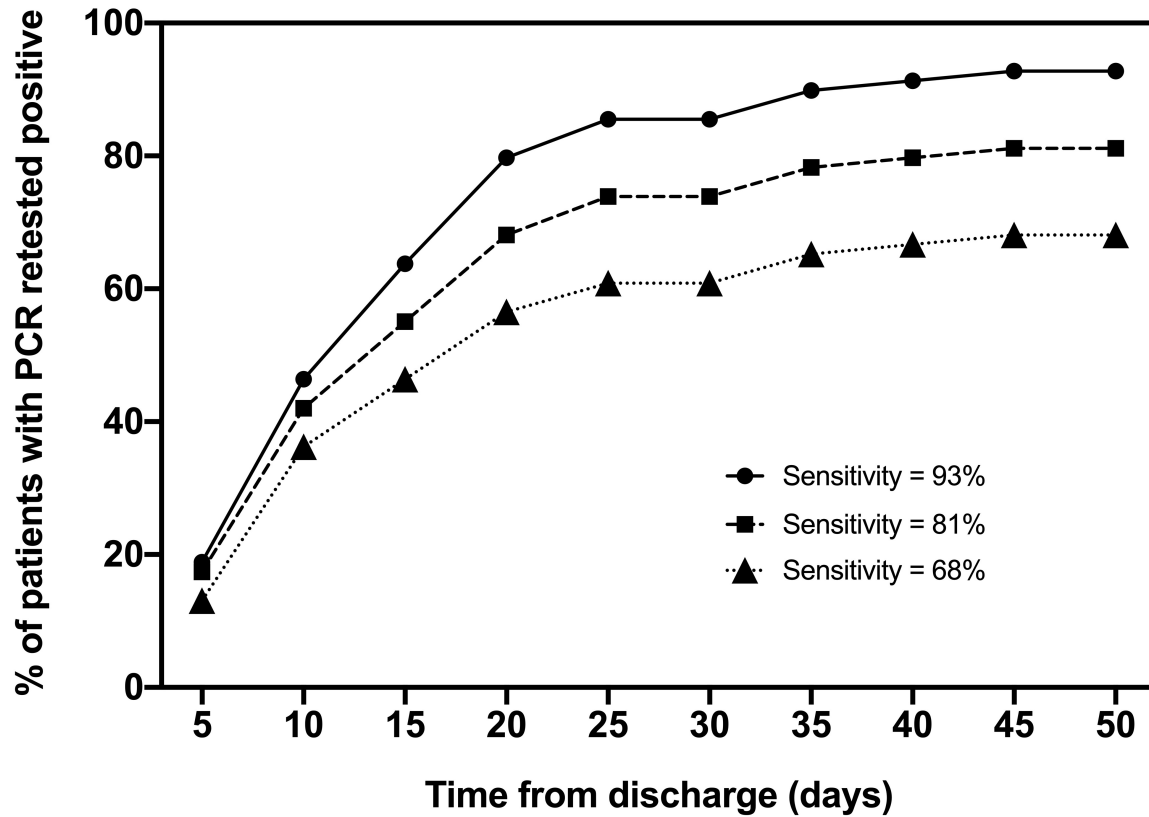

Supplement: Supplementary file [file 2020.05.06.20089573-6.pdf]
